# Supplementary material for: Comparative Mapping Between Coho Salmon (Oncorhynchus kisutch) and Three Other Salmonids Suggests a Role for Chromosomal Rearrangements in the Retention of Duplicated Regions Following a Whole Genome Duplication Event
Source: PubMed Central journal article supplement (PMC4169165; doi:10.1534/g3.114.012294), 2014-07-21
Supplement: supp_g3.114.012294_012294SI.pdf [file supp_g3.114.012294_012294SI.pdf]

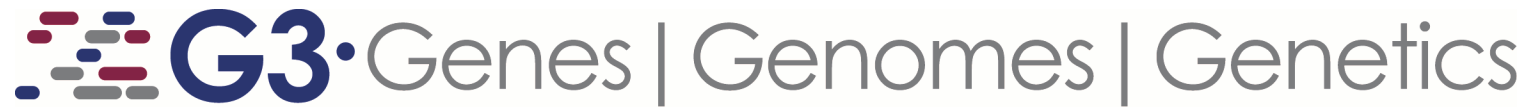

Comparative mapping between coho salmon (*Oncorhynchus kisutch*) and three other salmonids suggests a role for chromosomal rearrangements in the retention of duplicated regions following a whole genome duplication event

Miyako Kodama<sup>1§</sup>, Marine S O Briec<sup>1</sup>, Robert H Devlin<sup>2</sup>, Jeffrey J Hard<sup>3</sup> and Kerry A Naish<sup>1 §</sup>

<sup>1</sup>School of Aquatic and Fishery Sciences, University of Washington, Seattle, WA 98105, USA

<sup>2</sup>Fisheries and Oceans Canada, West Vancouver, British Columbia, V7K 1N6, Canada

<sup>3</sup>National Marine Fisheries Service, Northwest Fisheries Science Center, Seattle, WA 98112, USA

<sup>§</sup>Corresponding authors

Email addresses:

MK: mkodama@uw.edu

MJOB: mbriec@uw.edu

RHD: robert.devlin@dfo-mpo.gc.ca

JJH: Jeff.Hard@noaa.gov

KAN: knaish@uw.edu

DOI: 10.1534/g3.114.012294

File S1: Reference database of RAD loci for coho salmon

S1.1: Non-duplicated RAD loci in the reference database and corresponding sequences. Mapped markers have chromosome arm added to the name (CoXXXXX\_CoXX[a or b]). Markers falling in the putative location of the centromere, estimated by comparative mapping with Chinook salmon, have the linkage group followed by u (CoXXXXX\_CoXXu) where u designates arm placement unknown.

S1.2: Duplicated RAD loci in the reference baseline and corresponding sequences. The letter D was added after the marker name. Mapped markers have chromosome arm added to the name (CoXXXXX\_CoXX[a or b]). Markers falling in the putative location of the centromere, estimated by comparative mapping with Chinook salmon, have the linkage group followed by u (CoXXXXX\_CoXXu).

S1.3: RAD loci removed from the temporary reference database during screening and sequences.

File S2: Linkage maps

S2.1: The consensus female map constructed with two haploid families; marker distances are shown in centiMorgan (Kosambi distance).

S2.2: The consensus female map constructed with two haploid and three diploid families; details given are linkage groups, marker distances in centiMorgan (Kosambi), assignment of the marker to the Chinook salmon female map, Chinook salmon chromosomes and its position on the Chinook map.

S2.3: The consensus male map constructed with three diploid families; details given are linkage groups, marker distances in centiMorgan (Kosambi) and corresponding marker position on the consensus female map constructed with haploid and diploid female parents.

File S3: Difference in sizes between integrated female and male coho salmon linkage groups. The map lengths are presented in centiMorgan (Kosambi).

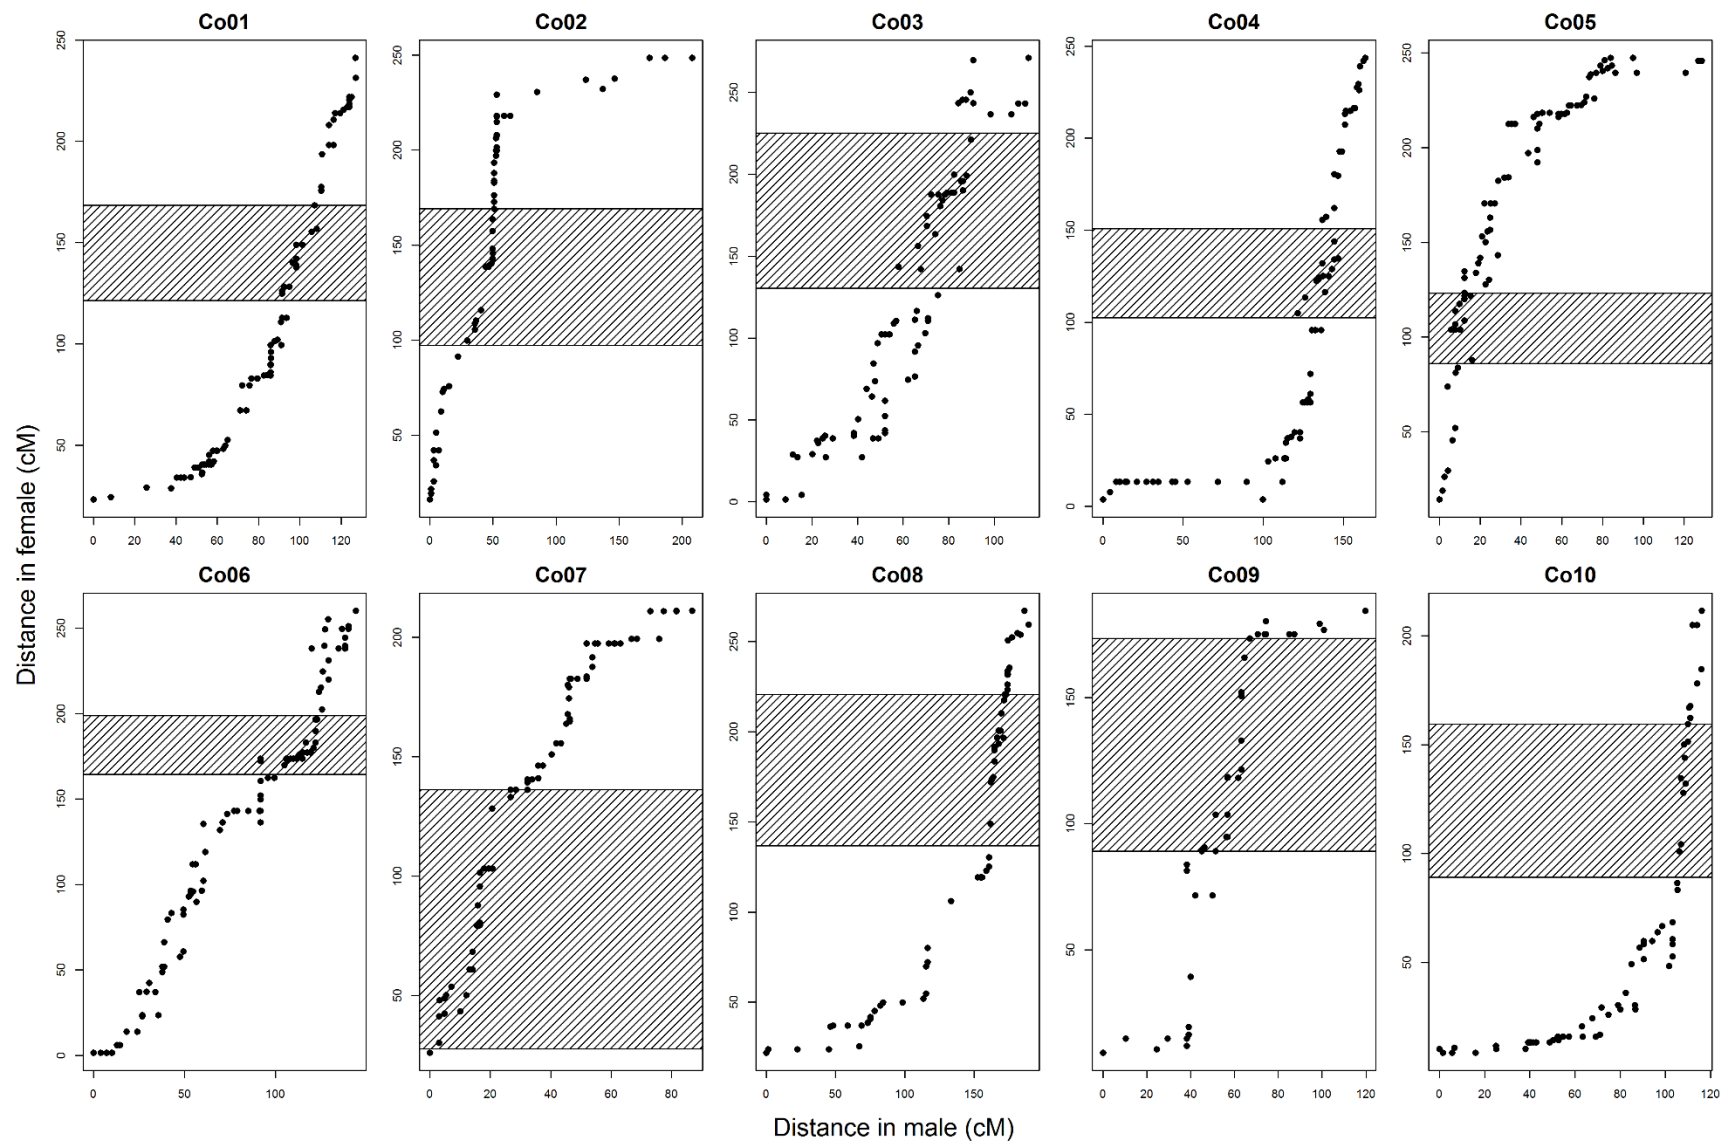

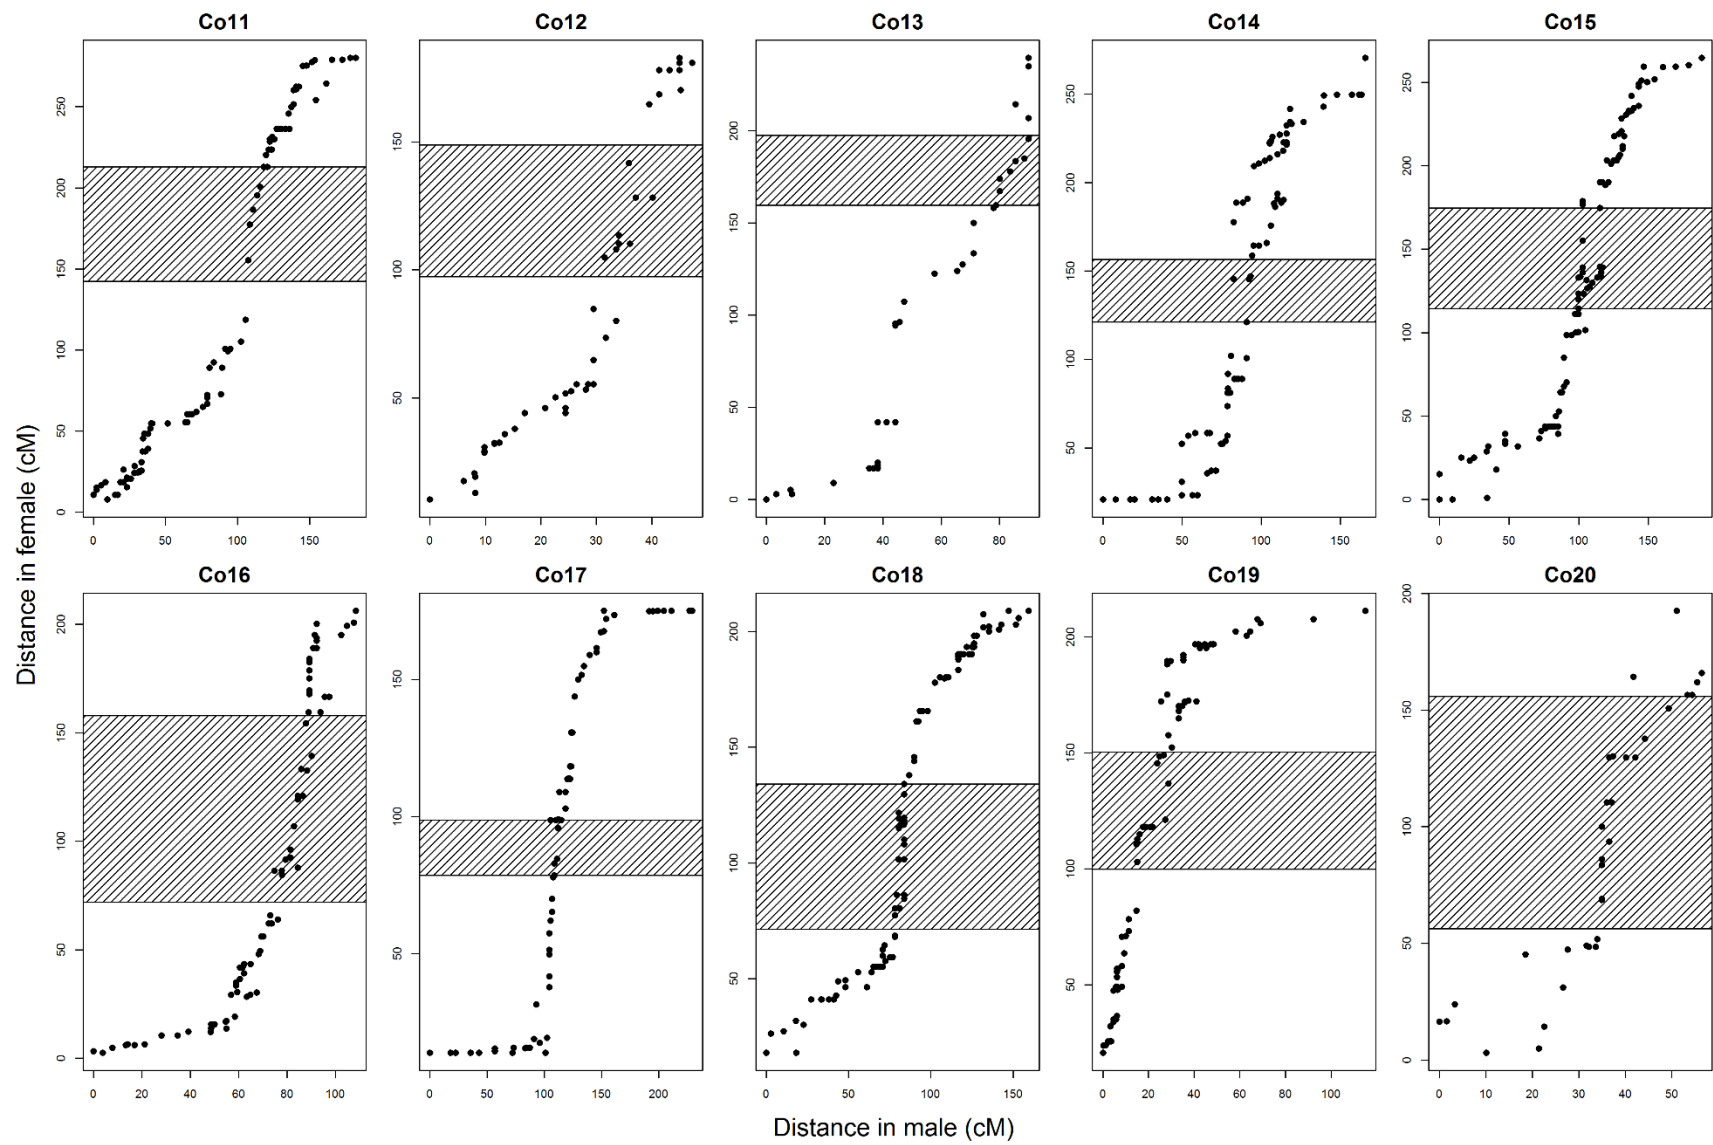

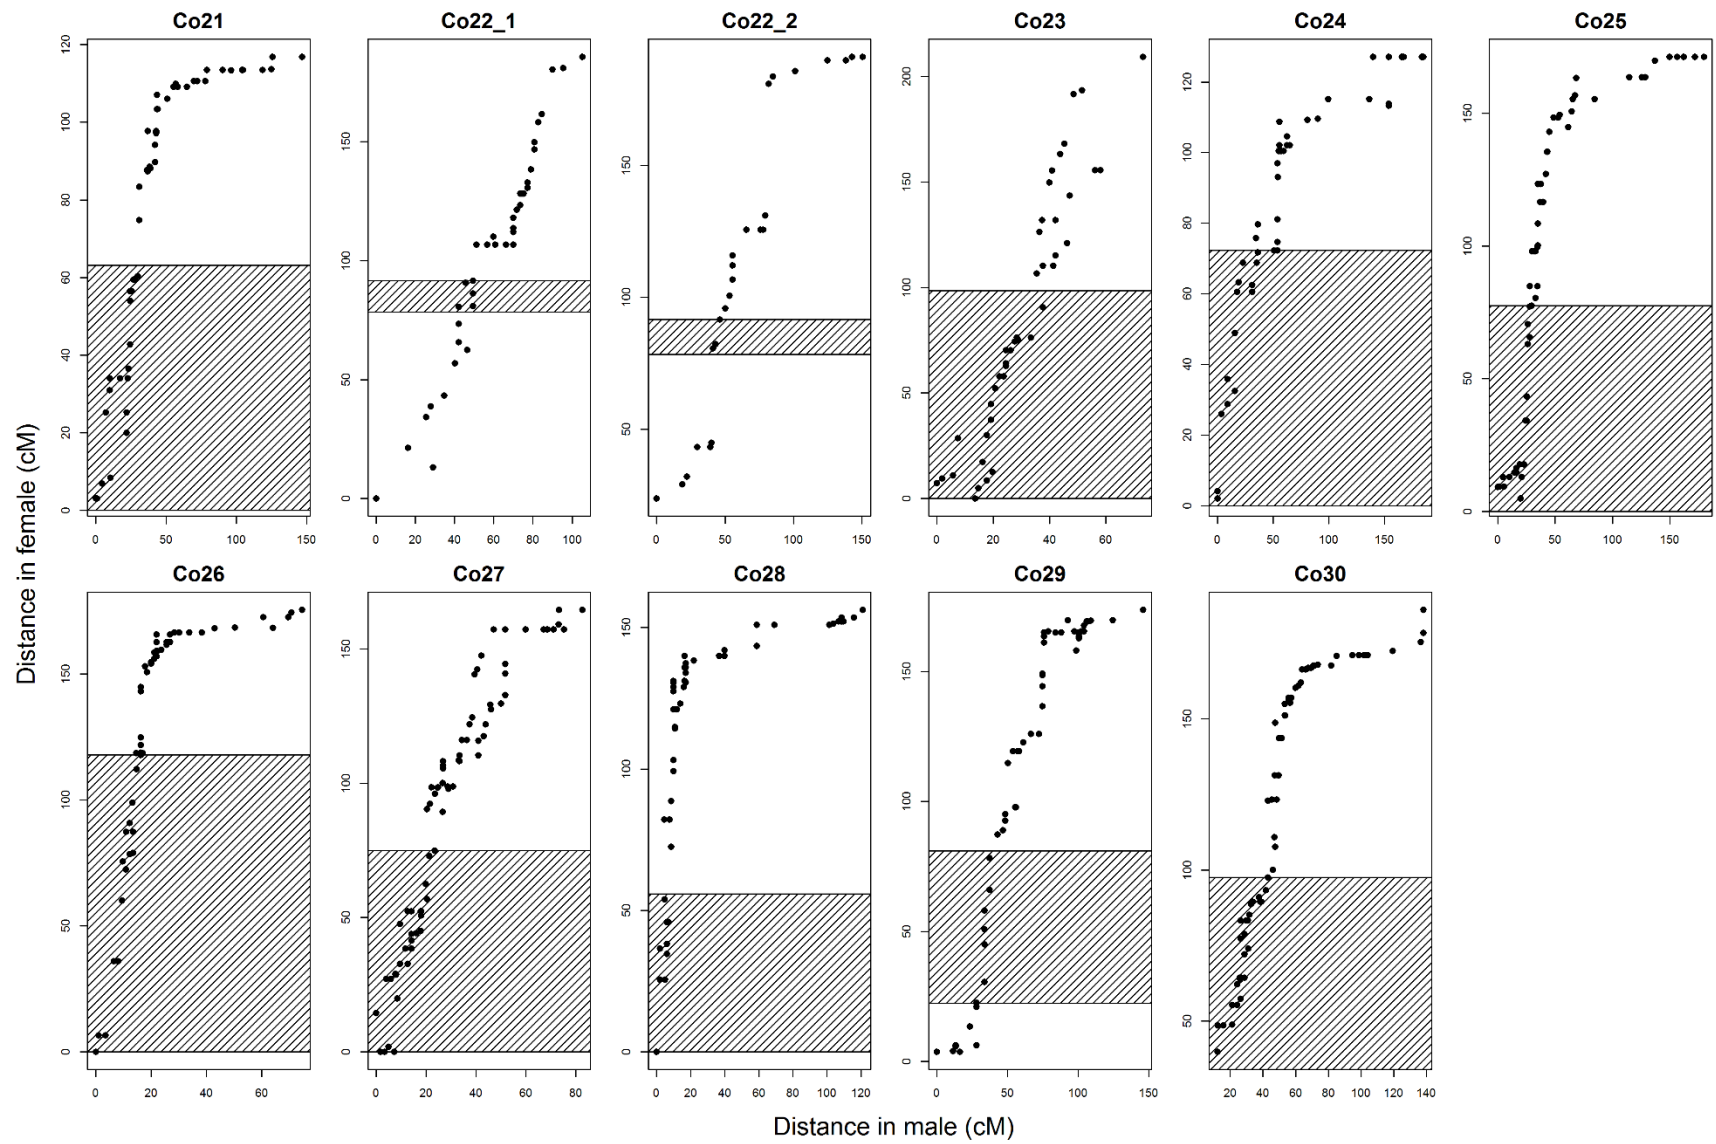

File S4: Relationship among positions of mapped RAD loci in common between the sexes. Presumed regions containing the centromere are represented by the cross-hatched area. The consensus female map constructed with haploid and diploid families (S2.2) was used for this comparison.



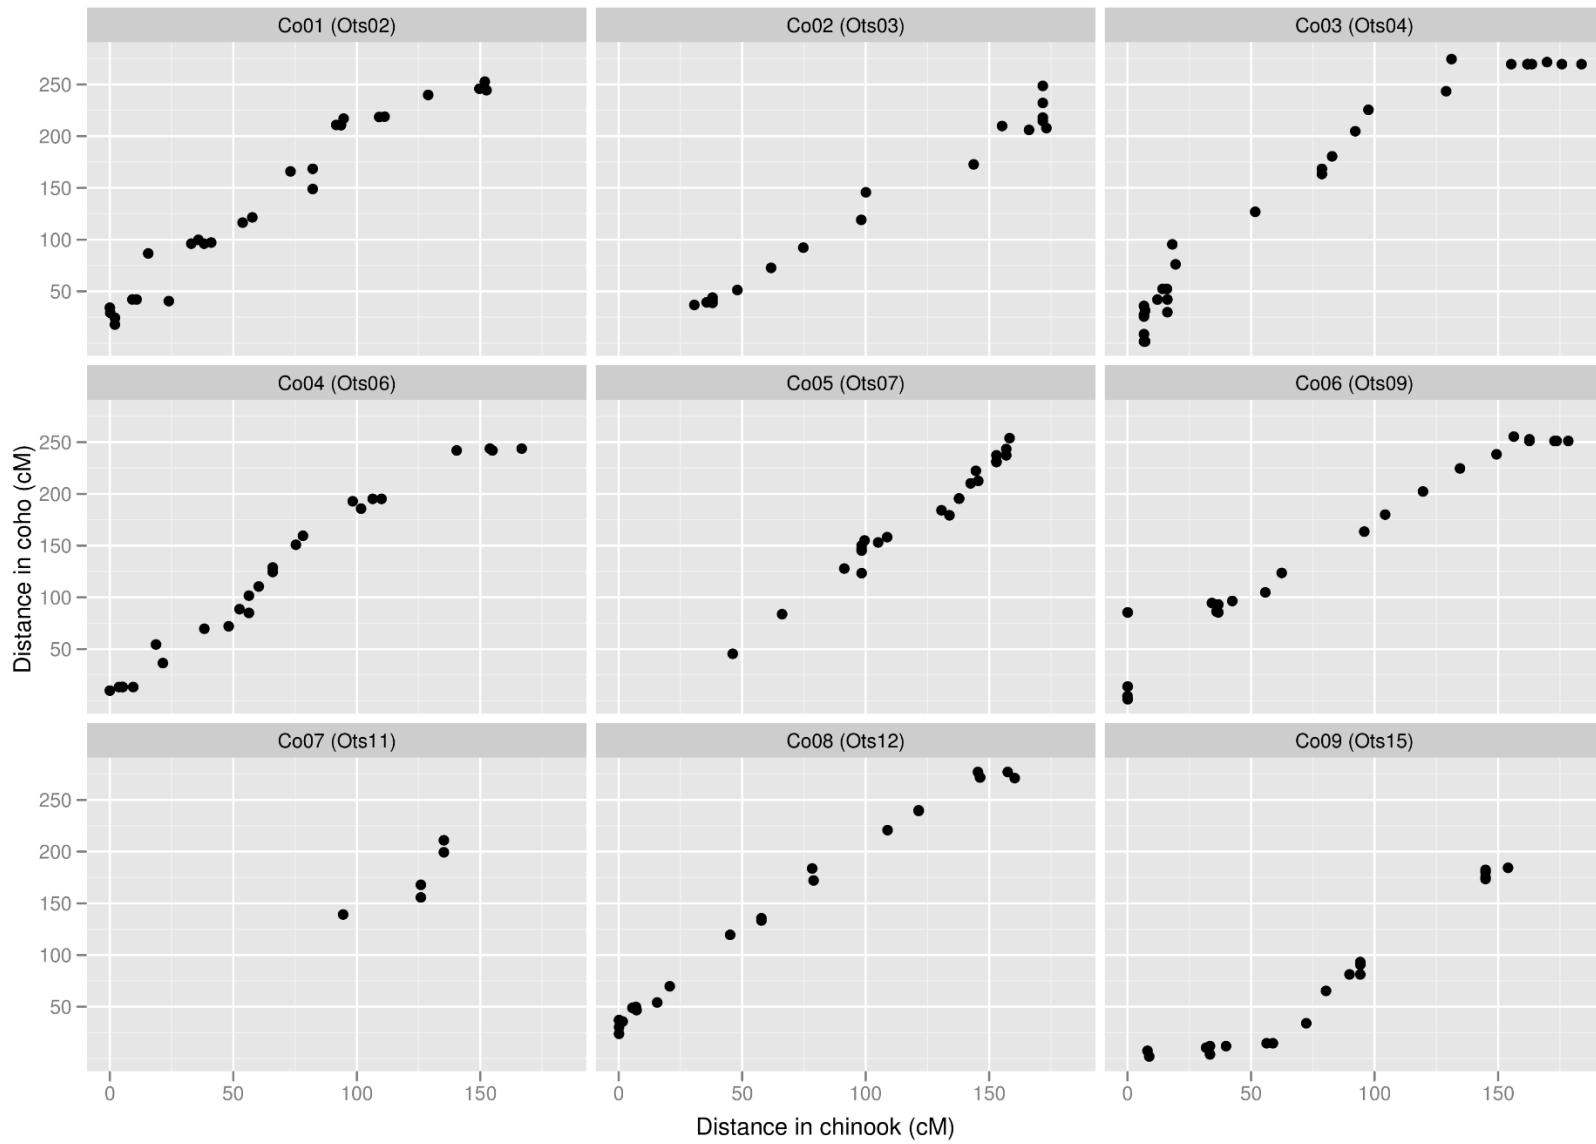

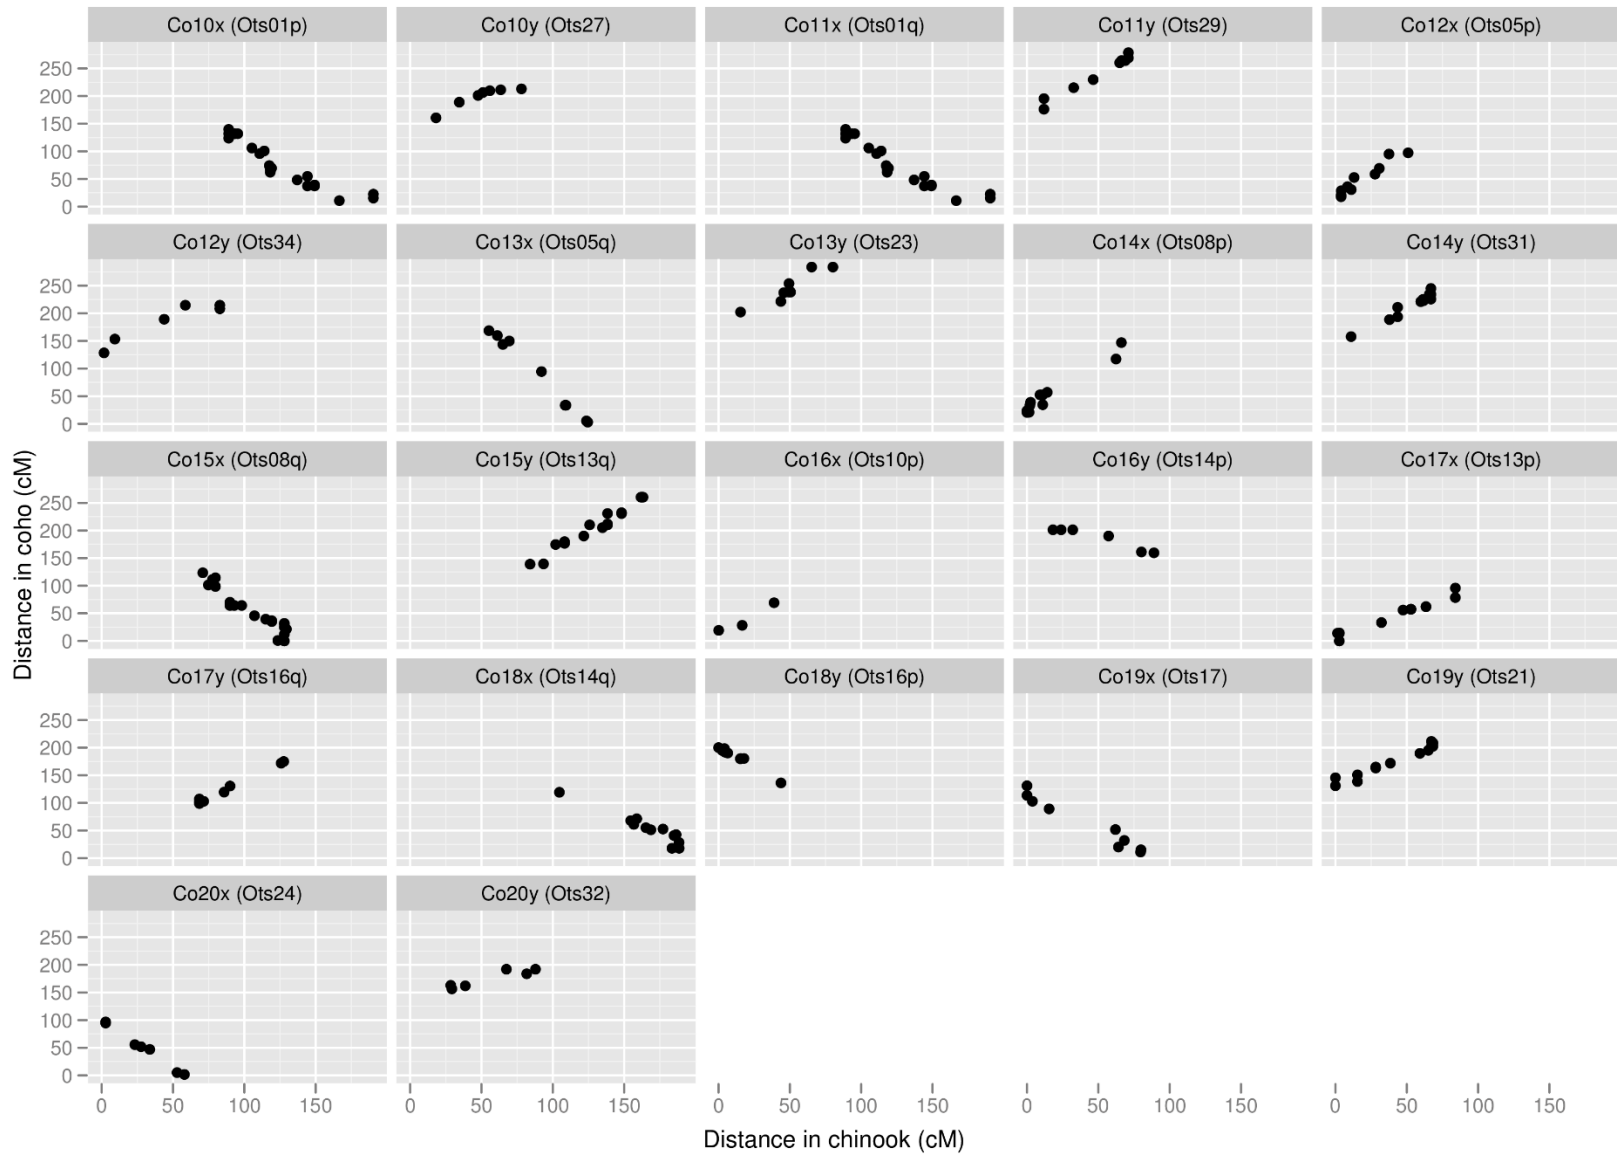

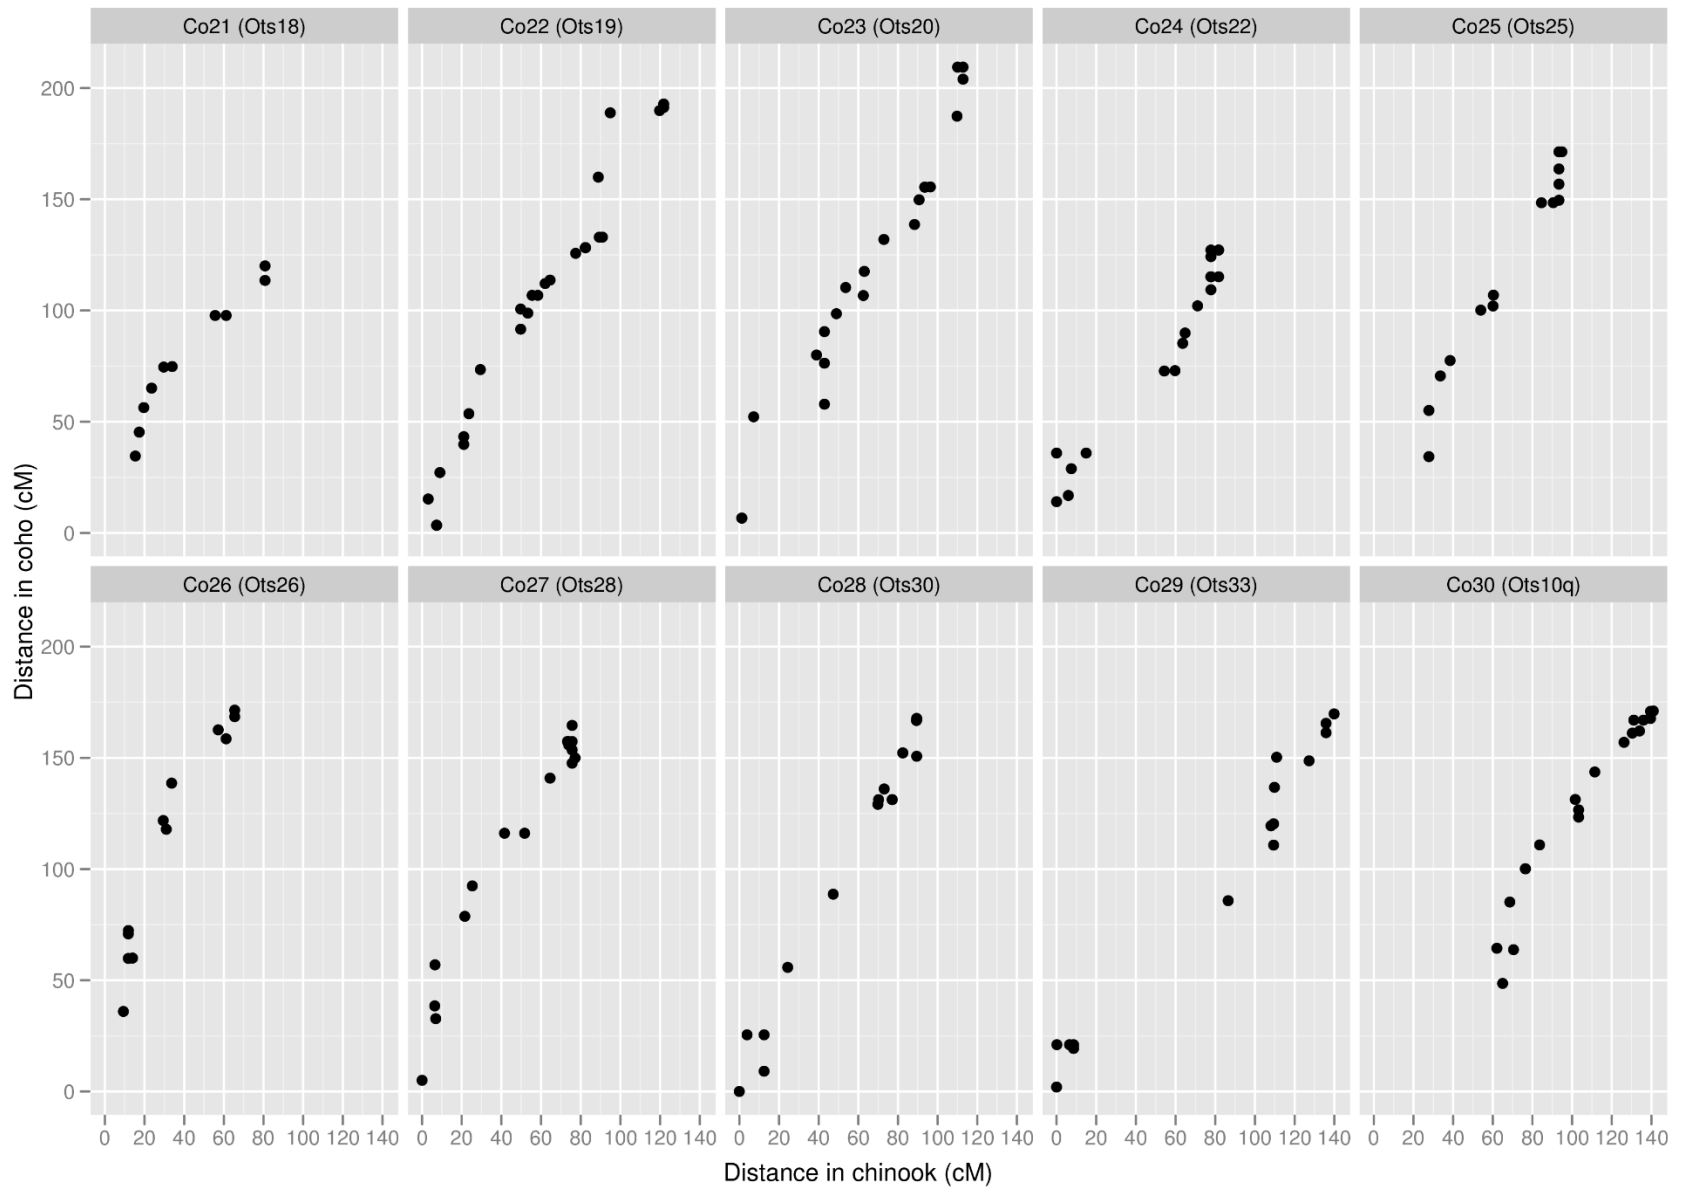



File S5: Relationship among mapped RAD loci in coho and Chinook salmon for all the linkage groups or arms.
