# Supplementary material for: Comparative Mapping Between Coho Salmon (Oncorhynchus kisutch) and Three Other Salmonids Suggests a Role for Chromosomal Rearrangements in the Retention of Duplicated Regions Following a Whole Genome Duplication Event
Source: PubMed Central journal article supplement (PMC4169165; doi:10.1534/g3.114.012294), 2014-07-21
Supplement: supp_g3.114.012294_FileS4.pdf [file supp_g3.114.012294_FileS4.pdf]

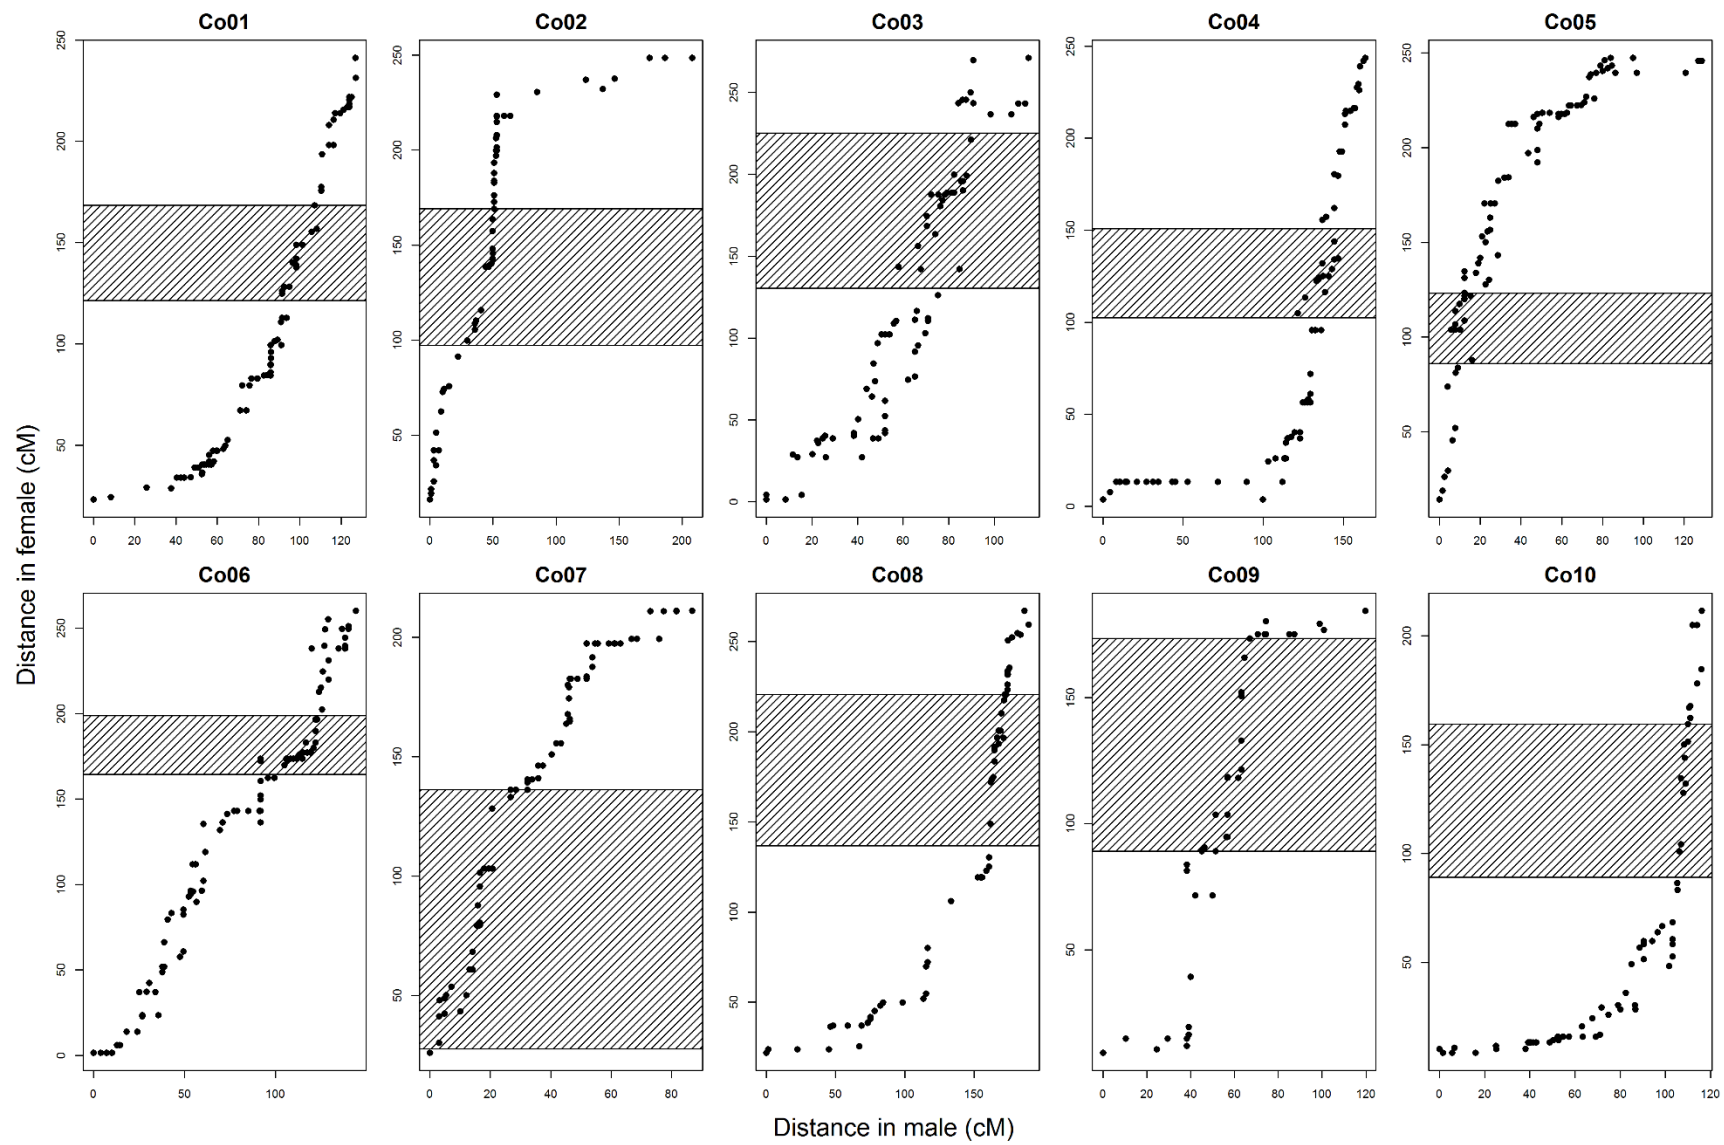

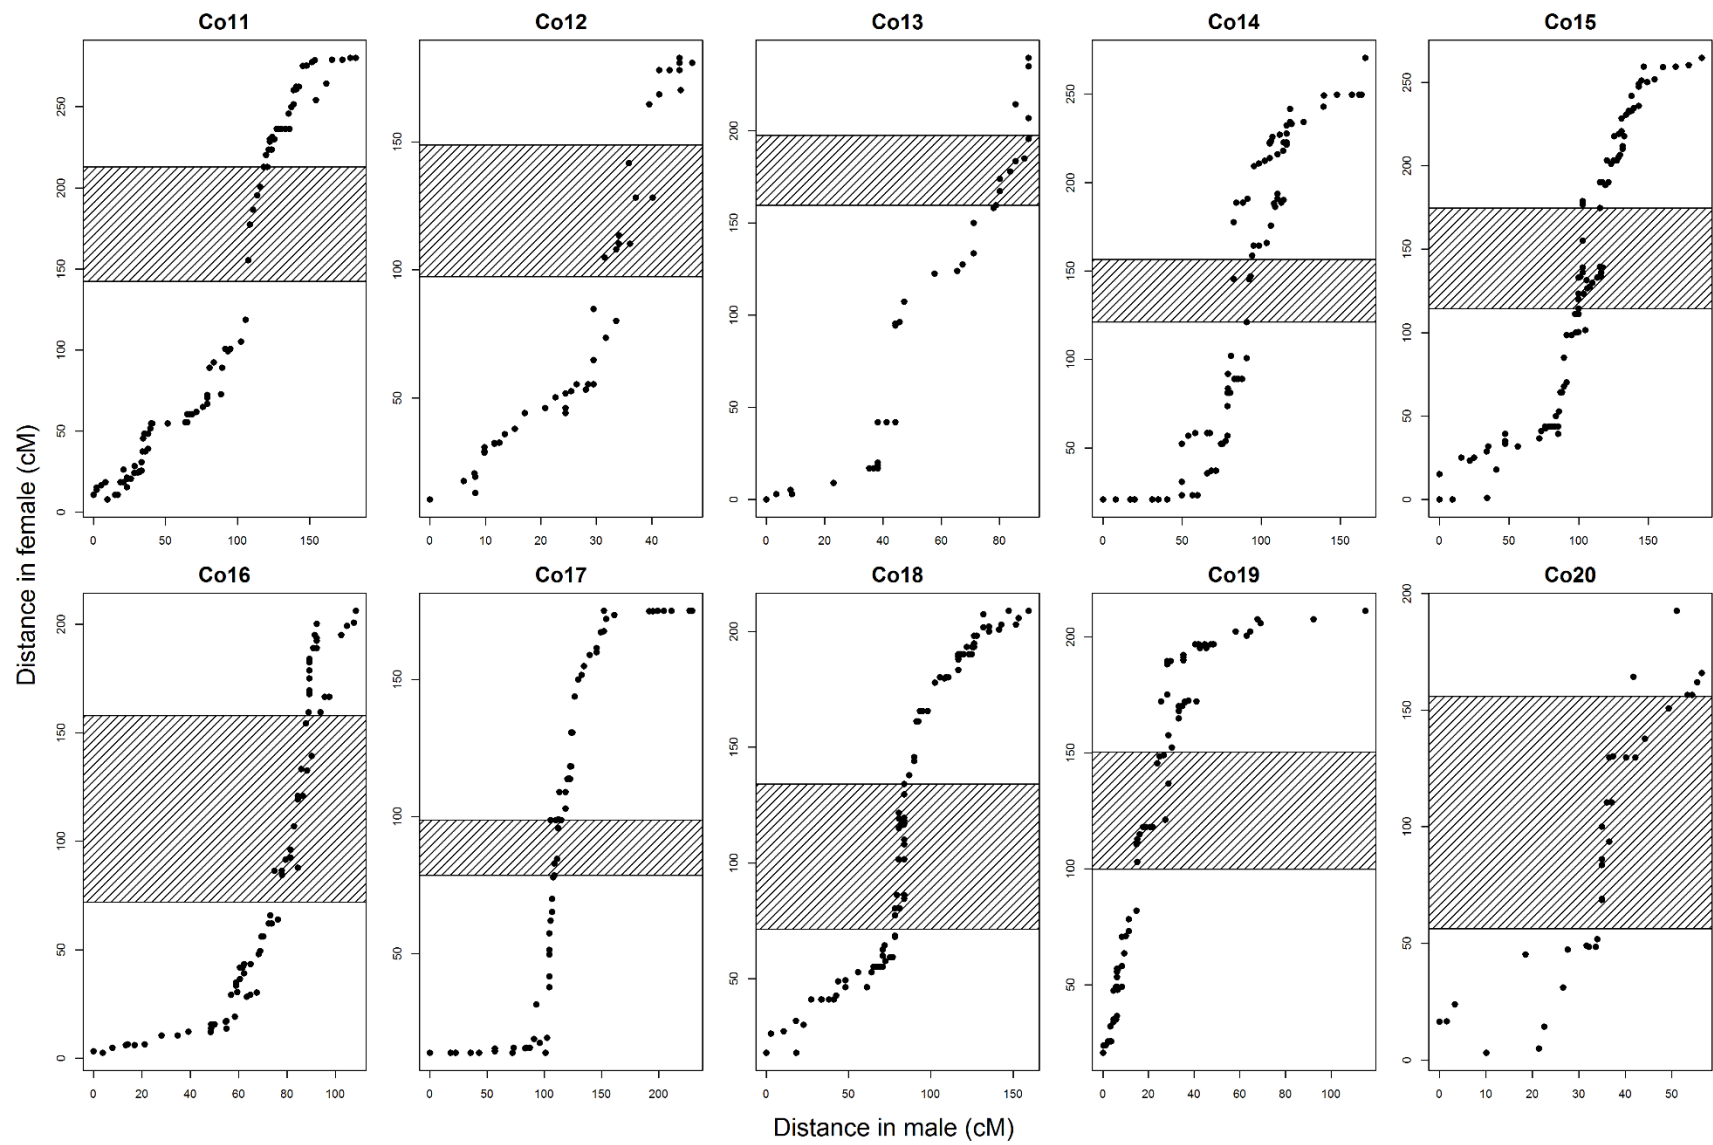

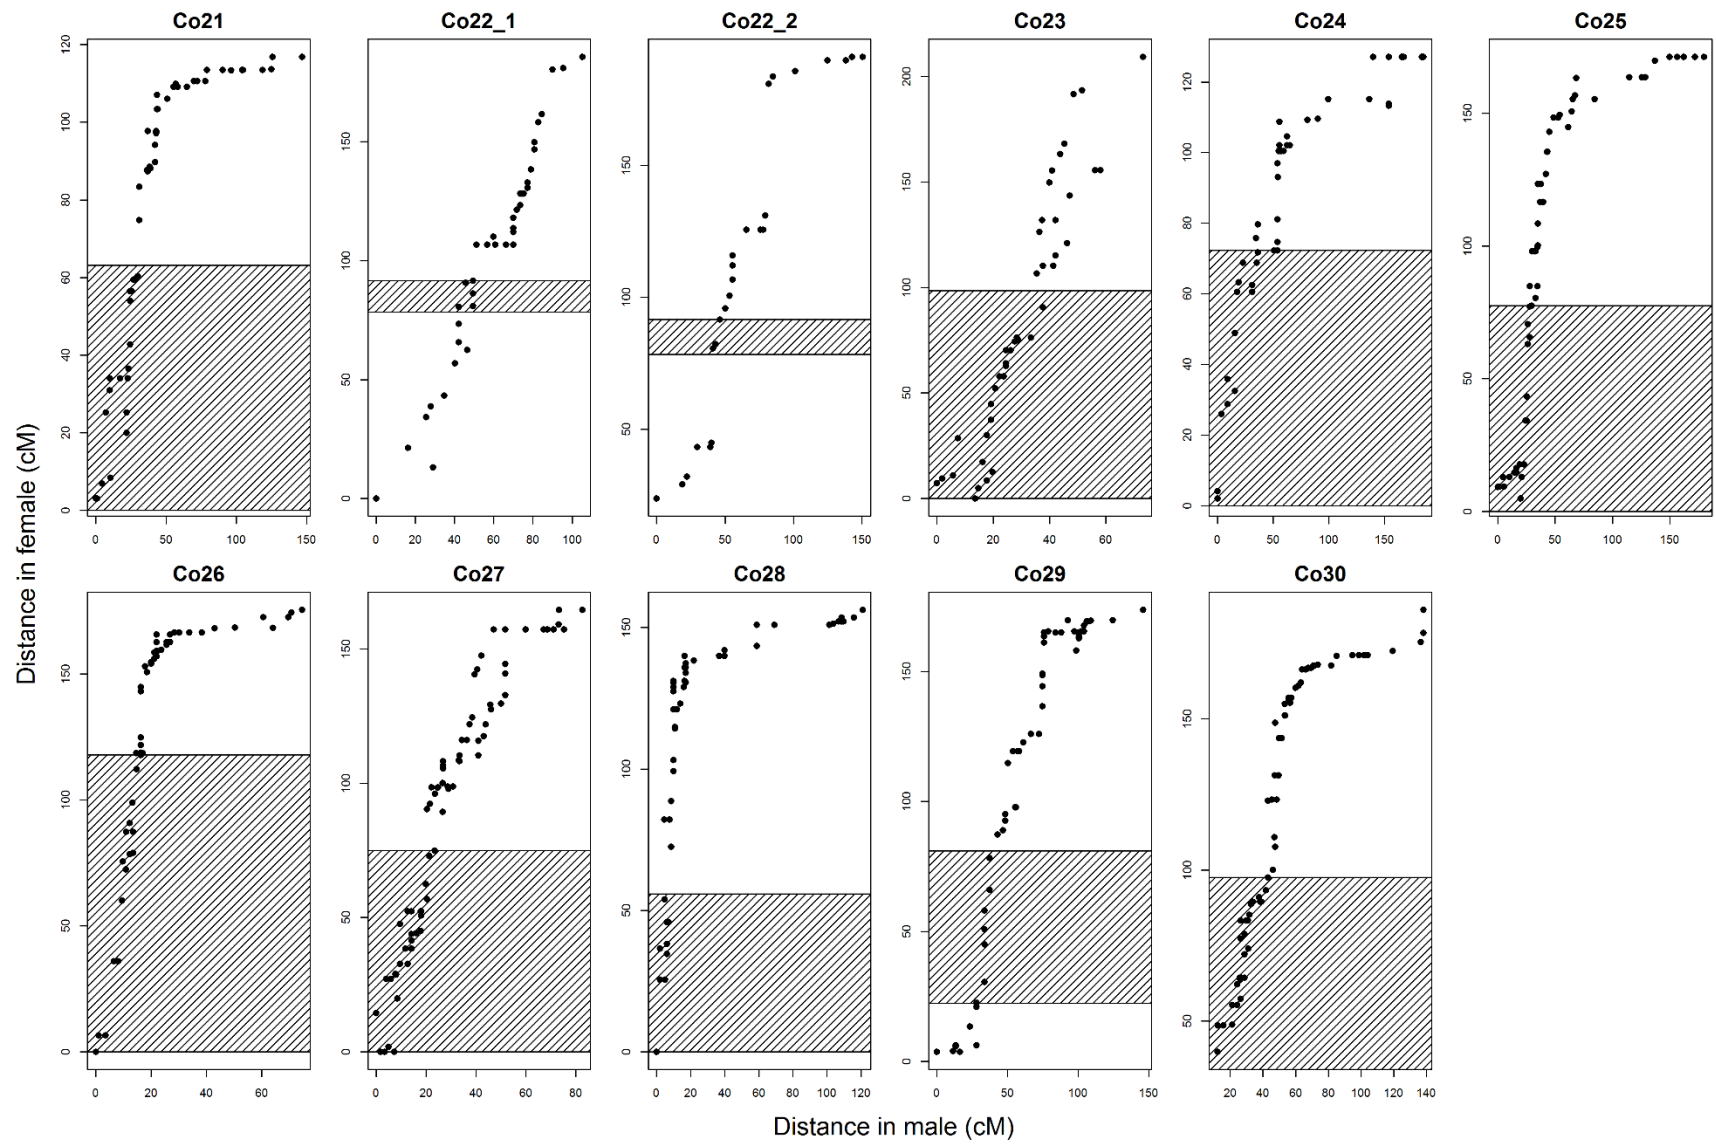

File S4: Relationship among positions of mapped RAD loci in common between the sexes. Presumed regions containing the centromere are represented by the cross-hatched area. The consensus female map constructed with haploid and diploid families (S2.2) was used for this comparison.
