# Supplementary material for: Comparative Mapping Between Coho Salmon (Oncorhynchus kisutch) and Three Other Salmonids Suggests a Role for Chromosomal Rearrangements in the Retention of Duplicated Regions Following a Whole Genome Duplication Event
Source: PubMed Central journal article supplement (PMC4169165; doi:10.1534/g3.114.012294), 2014-07-21
Supplement: supp_g3.114.012294_FileS5.pdf [file supp_g3.114.012294_FileS5.pdf]

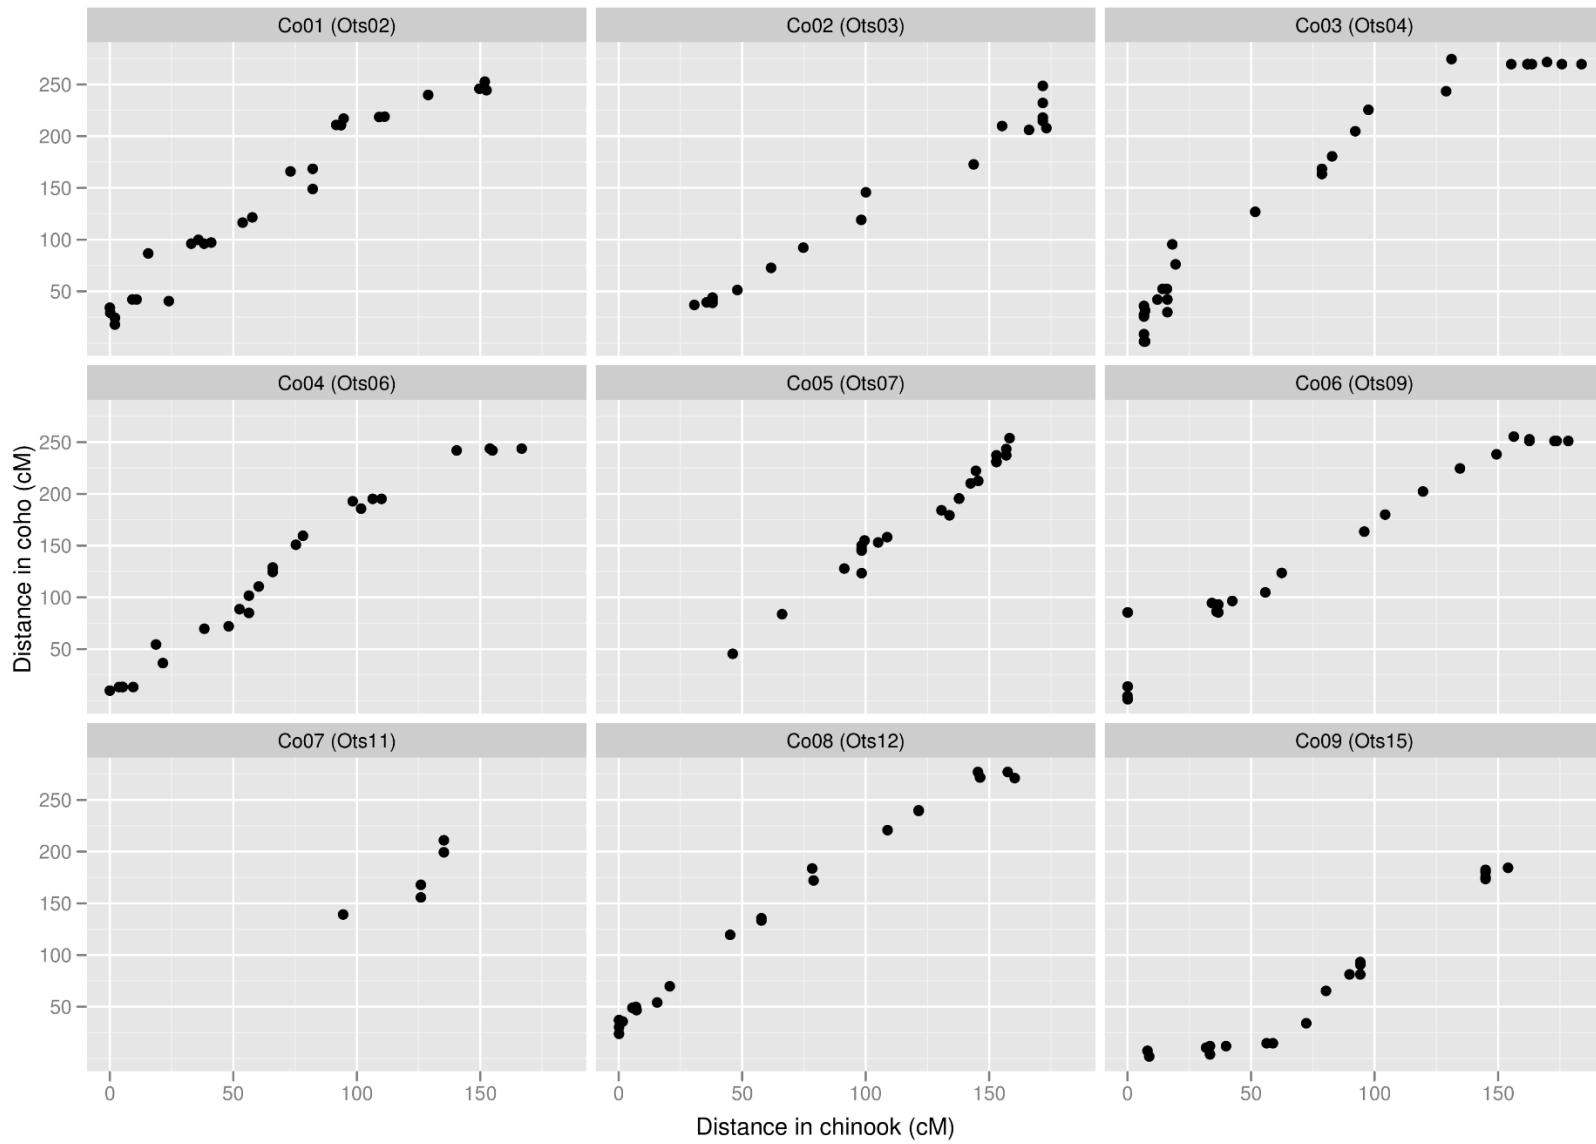

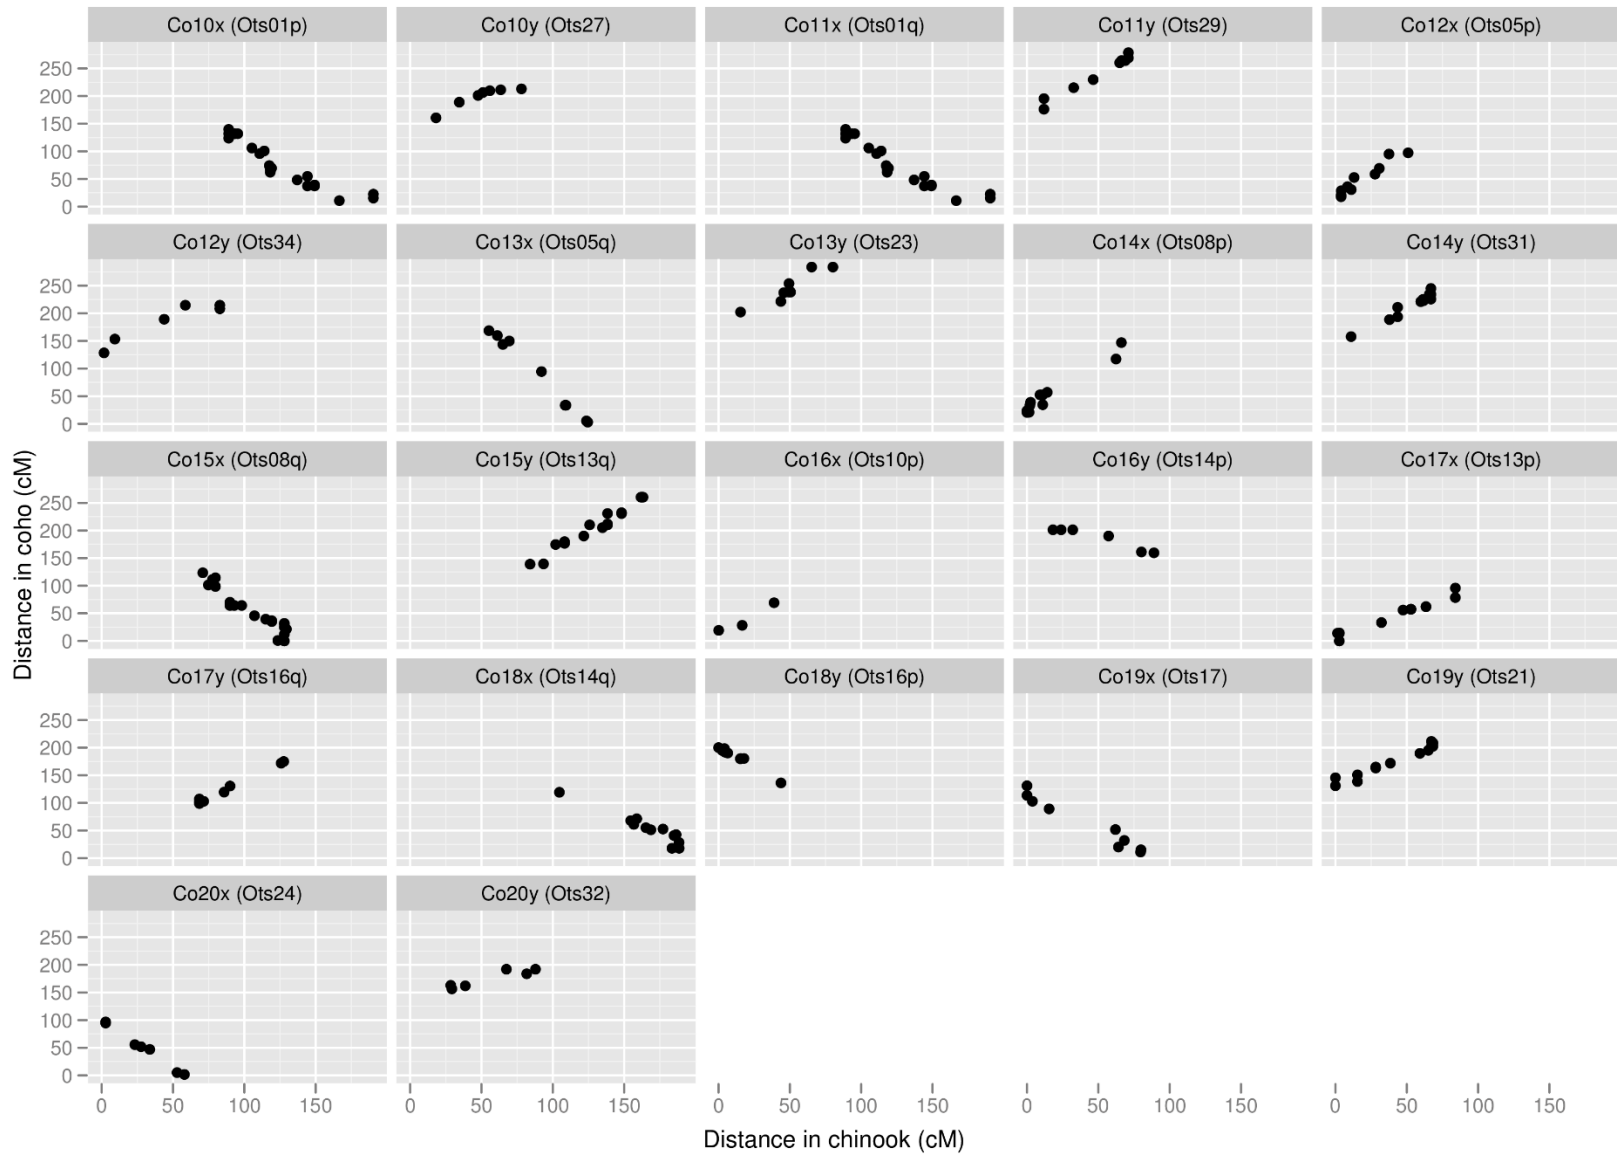

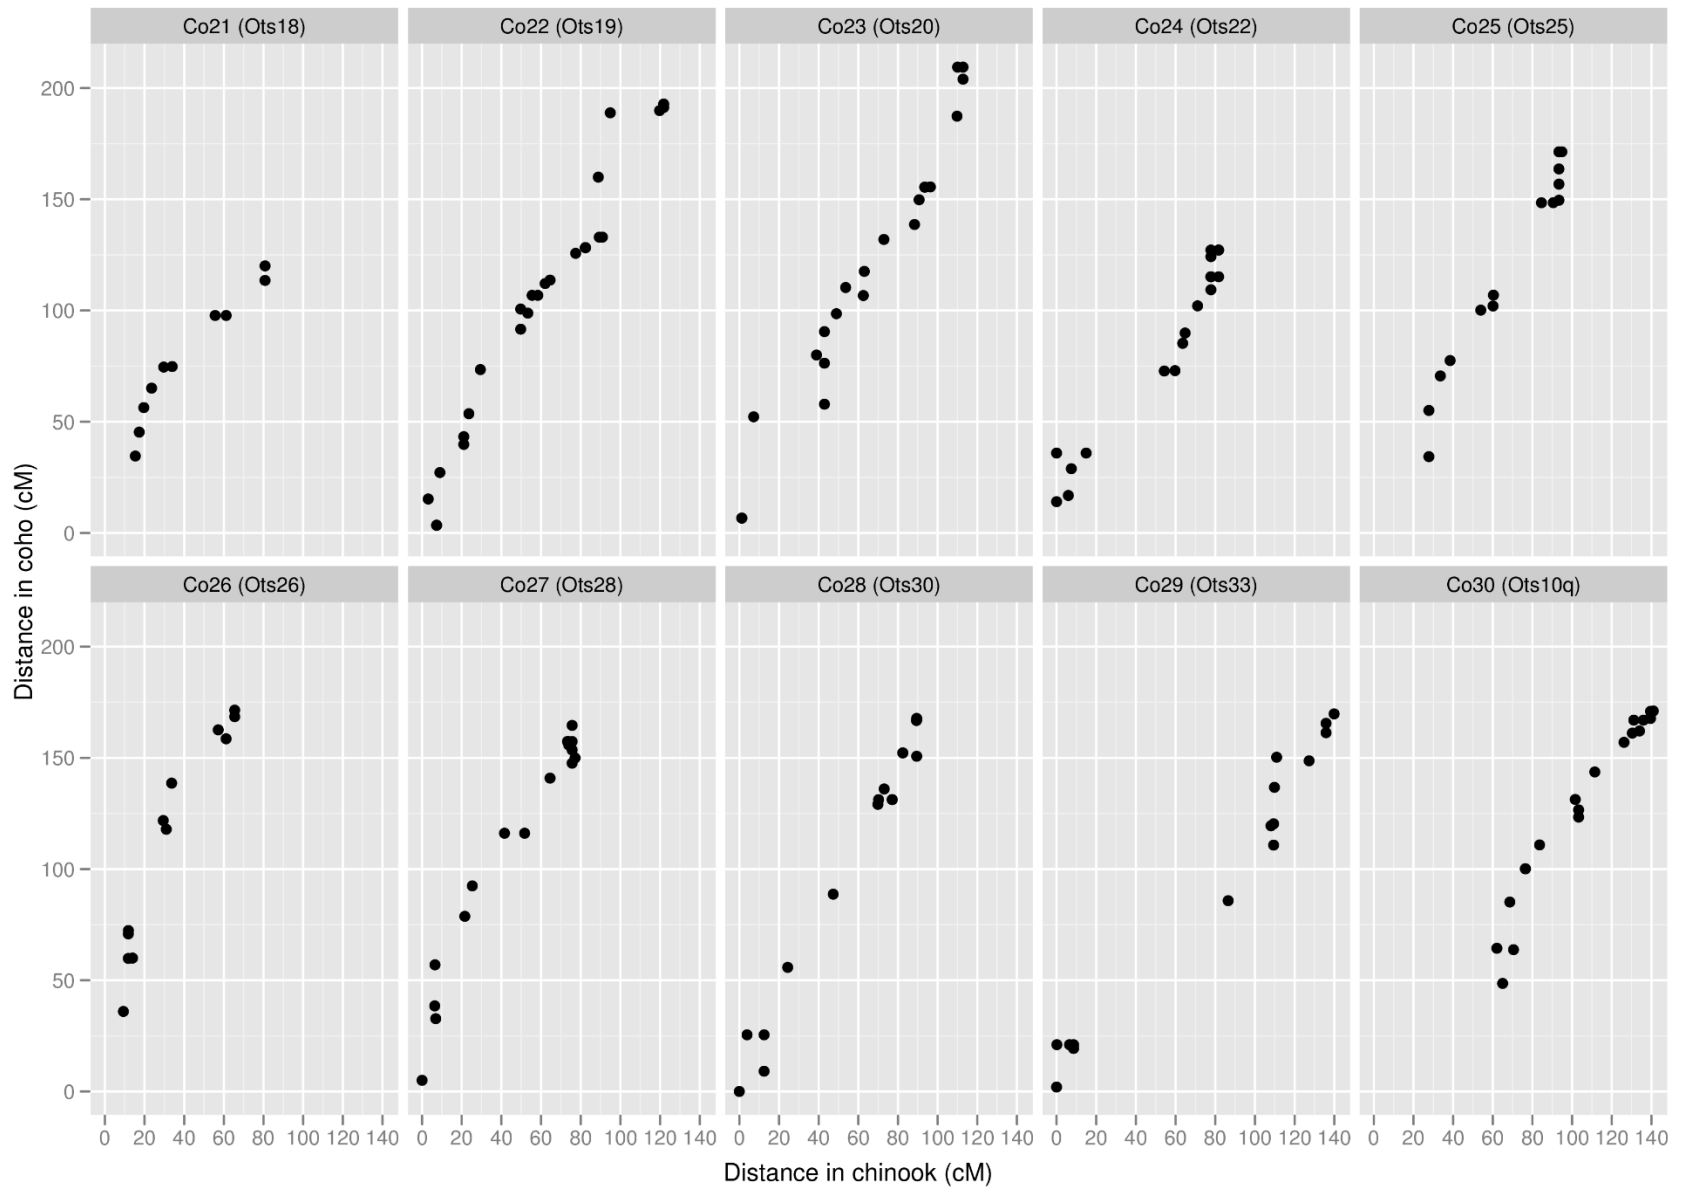



File S5: Relationship among mapped RAD loci in coho and Chinook salmon for all the linkage groups or arms.
